# Supplementary material for: Fluorescence assay for alkaline phosphatase activity based on energy transfer from terbium to europium in lanthanide coordination polymer nanoparticles
Source: Royal Society of Chemistry journal article supplement (doi:10.1039/c8tb01713a), 2018-01-01
Supplement: c8tb01713a1.pdf [file c8tb01713a1.pdf]

## Electronic Supplementary Information

### Fluorescent Assay for Alkaline Phosphatase Activity based on Energy Transfer from Terbium to Europium in Lanthanide Coordination Polymer Nanoparticles

*Fengyi Wang<sup>a</sup>, Xuan Hu<sup>a</sup>, Jing Hu<sup>a</sup>, Qianqian Peng<sup>a</sup>, Baozhan Zheng<sup>a, b\*</sup>, Juan Du<sup>a, b\*</sup>, and Dan Xiao<sup>a, b</sup>*

<sup>a</sup> *College of Chemistry, Sichuan University, No. 29 Wangjiang Road, Chengdu 610064, PR China.*

<sup>b</sup> *Key Laboratory of Green Chemistry and Technology, Ministry of Education, College of Chemistry, Sichuan University, Chengdu, Sichuan 610064, China*

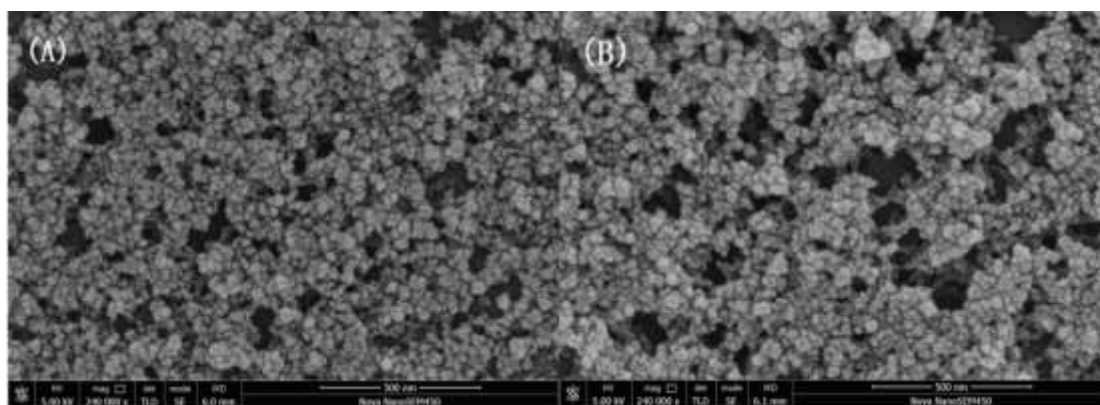

**Fig. S1** SEM image of Tb-GMP (A) and Tb-GMP-Eu CPNs (B).

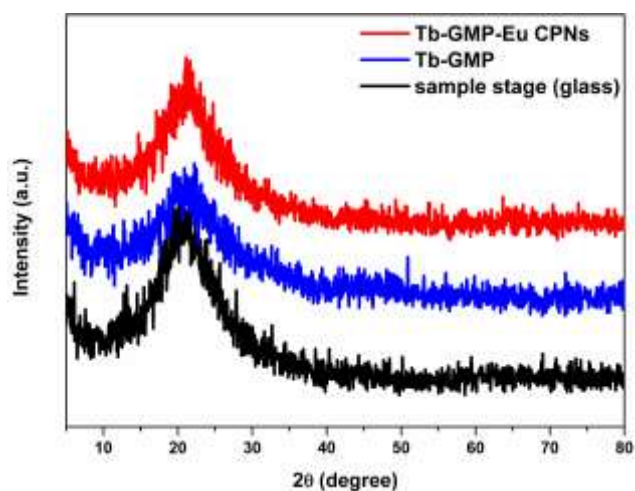

**Fig.S2** X-ray diffraction (XRD) patterns of powdery Tb-GMP-Eu CPNs (red line) and Tb-GMP (blue line) and sample stage (black line).

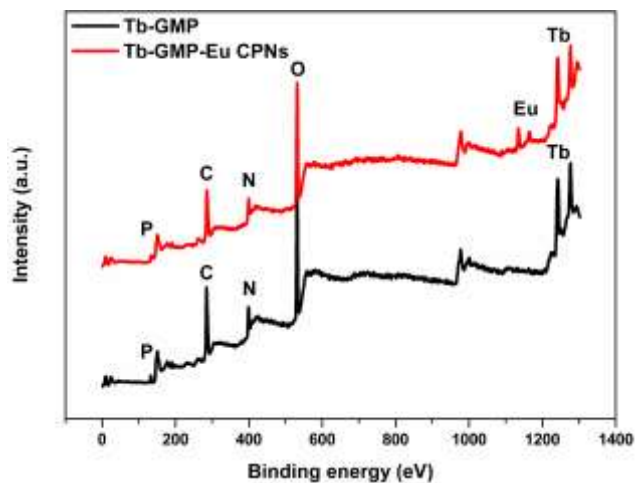

**Fig.S3** XPS survey scan of Tb-GMP-Eu CPNs (red line) and Tb-GMP (black line).

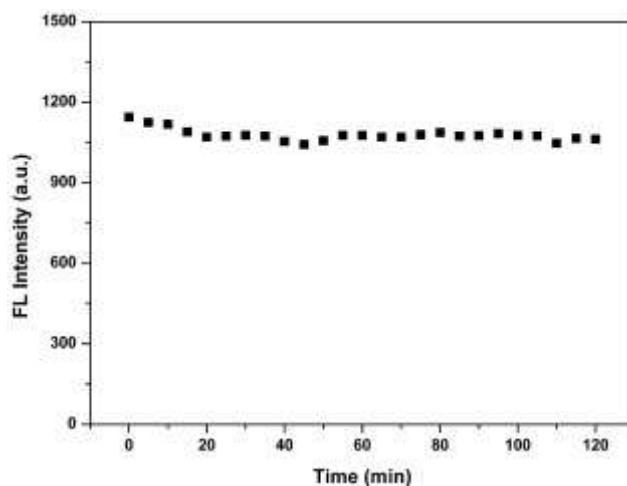

**Fig.S4** Fluorescence intensity of Tb-GMP-Eu CPNs dispersed in 10 mM pH 7.4 Tris-HCl buffer solution.

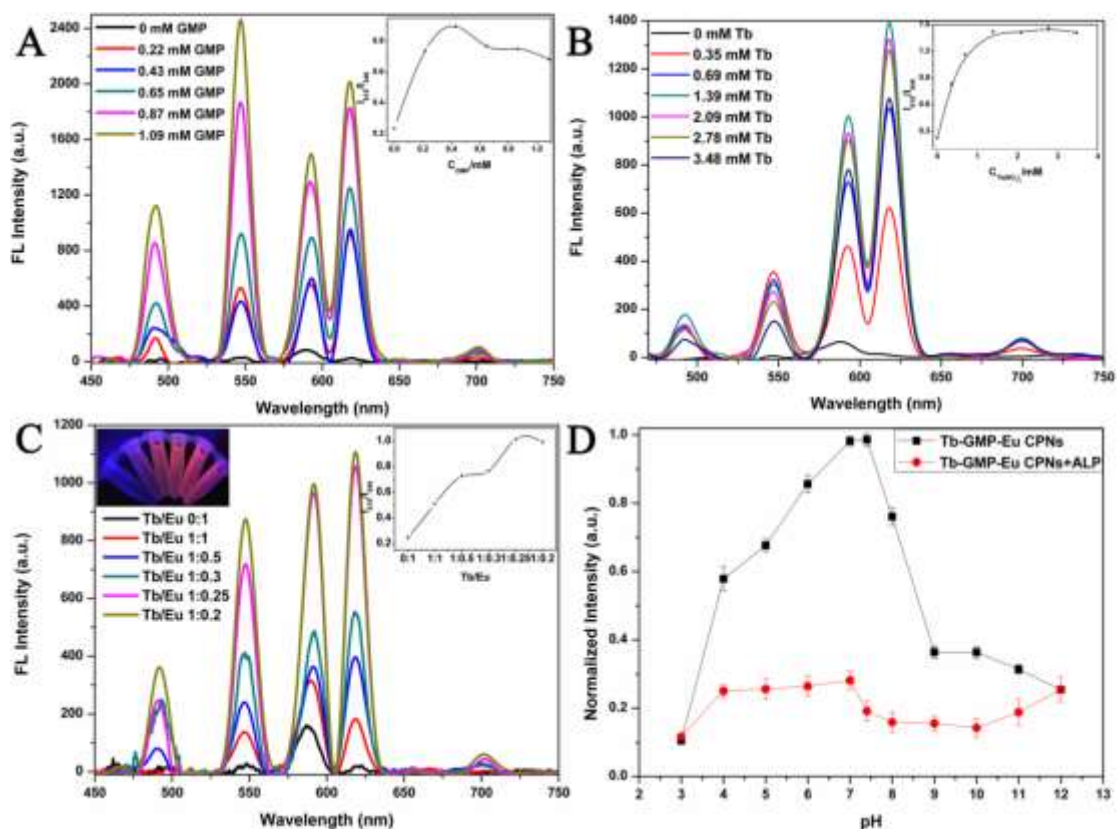

**Fig.S5** Concentration optimization of GMP (A) and Tb ( $\text{NO}_3$ )<sub>3</sub> at 0.35 mM of Eu ( $\text{NO}_3$ )<sub>3</sub> (B) and molar ratio investigation of Tb/Eu from 0:1 to 1:0.2 at 0.35 mM of Tb ( $\text{NO}_3$ )<sub>3</sub> (Inset: photograph of different Tb/Eu molar ratio from left to right corresponding to 0:1, 1:1, 1:0.5, 1:0.3, 1:0.25, 1:0.2) (C) and Effects of pH of reaction media on the fluorescence intensity of Tb-GMP-Eu CPNs in the absence (black line) and presence (red line) of ALP at 618 nm (D).

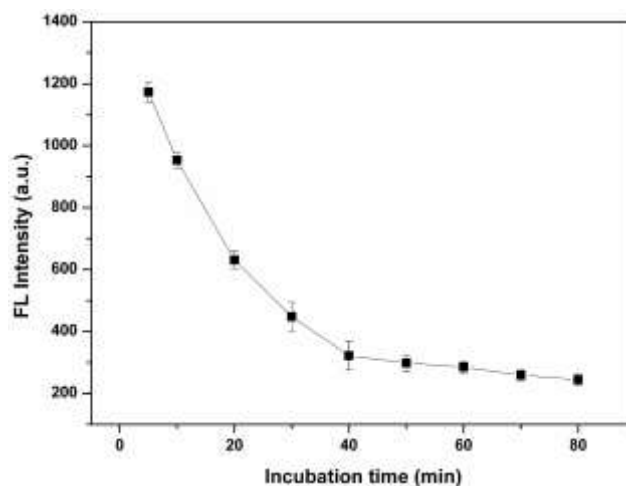

**Fig.S6** The fluorescence intensity of Tb-GMP-Eu CPNs in the presence of ALP ( $40 \text{ U L}^{-1}$ ) versus incubation time

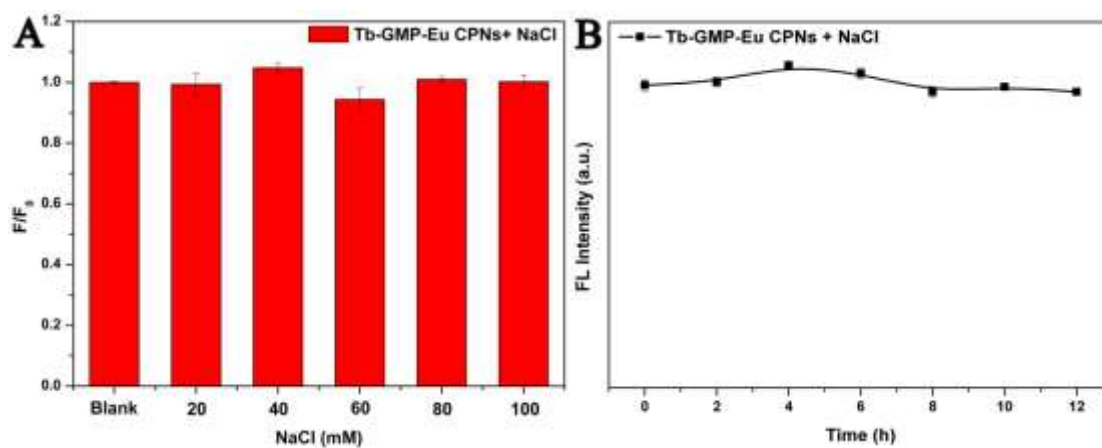

**Fig.S7** (A) Effect of different concentrations of salt solution on the fluorescence intensity of Tb-GMP-Eu CPNs (B) The fluorescence stability of Tb-GMP-Eu CPNs in high strength ionic solution (100 mM)

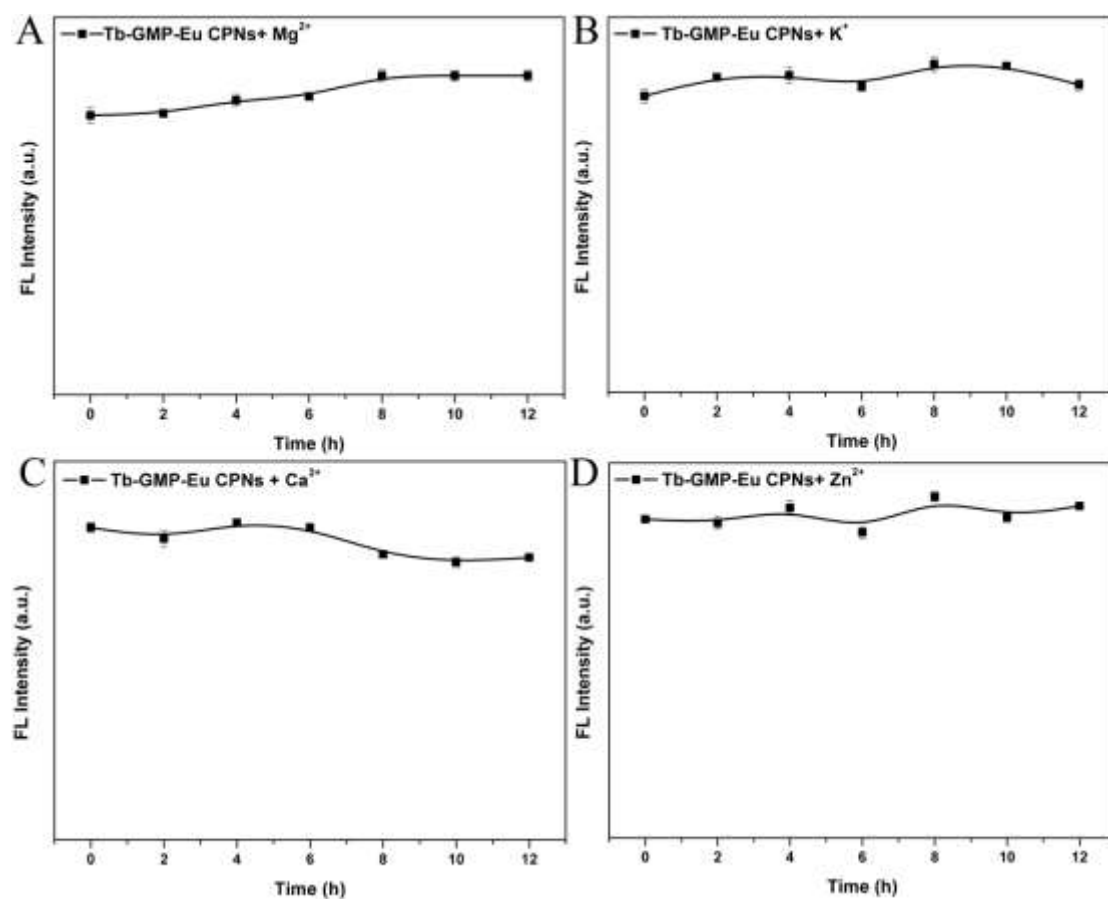

**Fig. S8** The fluorescence stability of Tb-GMP-Eu CPNs in the presence of common metal ions (50  $\mu$ M) including  $Mg^{2+}$ ,  $K^+$ ,  $Ca^{2+}$ ,  $Zn^{2+}$ .

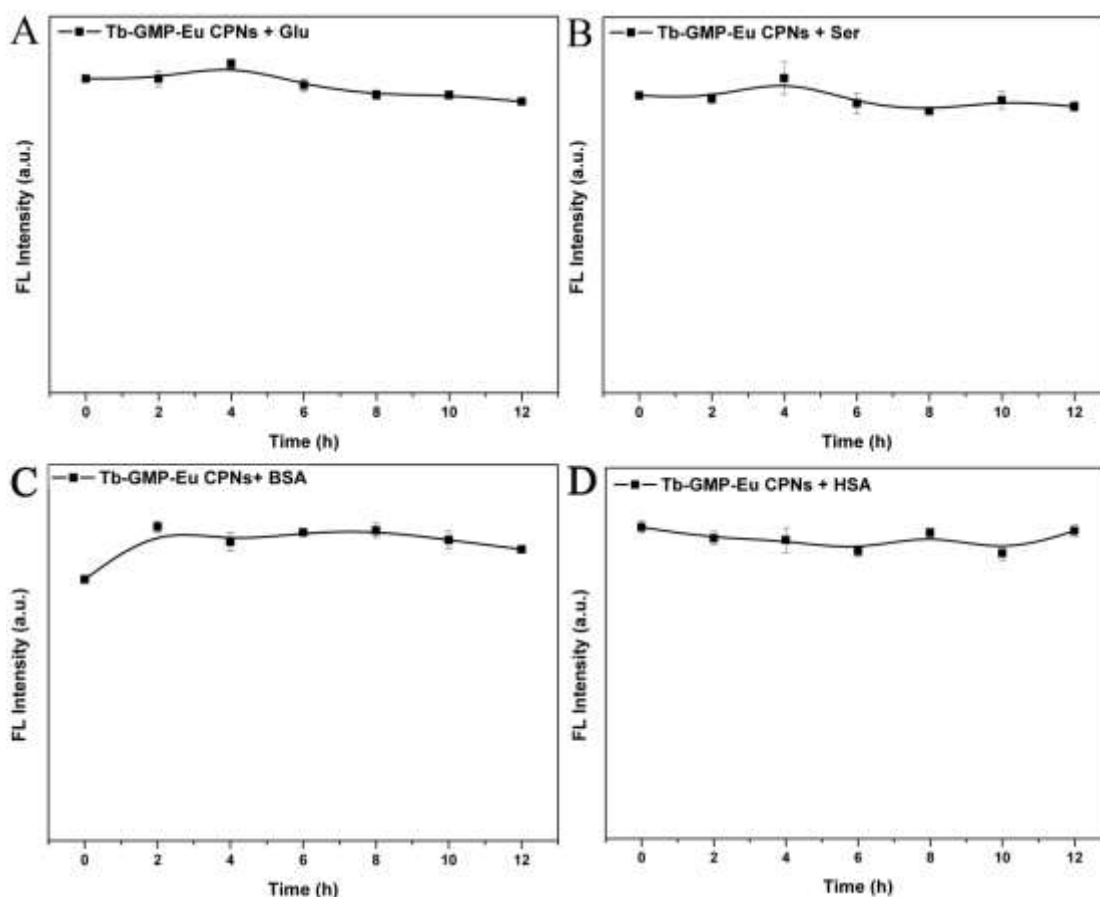

**Fig. S9** The fluorescence stability of Tb-GMP-Eu CPNs in the presence of glutamic acid (Glu) (A), serine (Ser) (50  $\mu$ M) (B) and bovine serum albumin (BSA) (C), human serum albumin (HSA) (0.25 mg mL<sup>-1</sup>) (D)

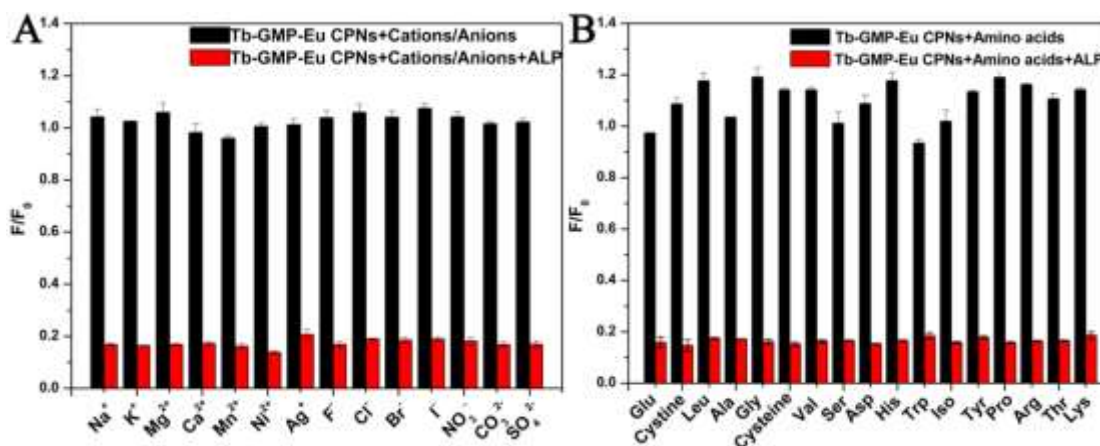

**Fig.S10** (A) Fluorescence responses of Tb-GMP-Eu CPNs (0.12 mg.mL<sup>-1</sup>) upon the addition of different amino acids (50  $\mu$ M) in the absence and presence of ALP (40 U L<sup>-1</sup>) ( $\lambda_{ex}$ =290 nm); (B) Fluorescence responses of Tb-GMP-Eu CPNs (0.12 mg.mL<sup>-1</sup>) upon the addition of different metal ions (50  $\mu$ M) and anions (50  $\mu$ M) in the absence and presence of ALP (40 U L<sup>-1</sup>) ( $\lambda_{ex}$ =290 nm), where F and F<sub>0</sub> were the fluorescence intensities at 618 nm in presence and absence of ALP, respectively.

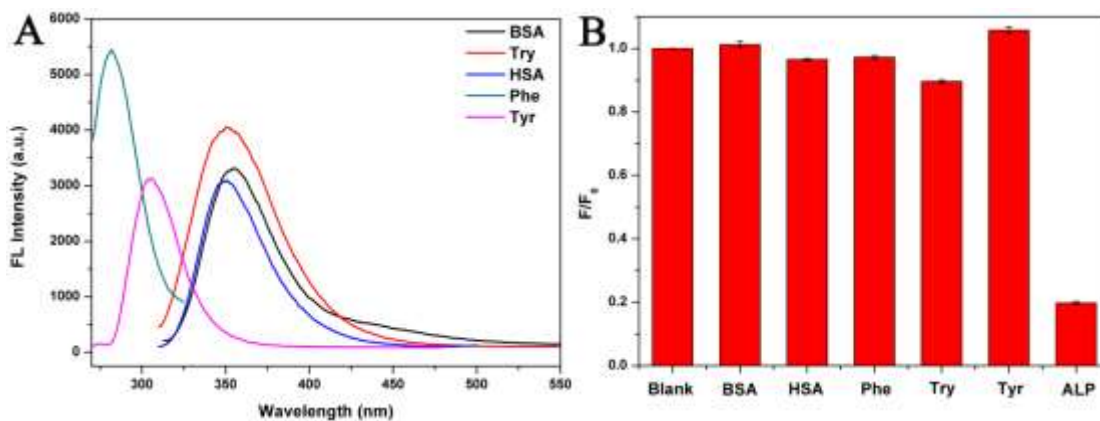

**Fig. S11** (A) The emission spectra of fluorescent biomolecules including bovine serum albumin (BSA), human serum albumin (HSA), tryptophan (Try), phenylalanine (Phe), tyrosine (Tyr), glucose oxidase (GOX). (B) The fluorescence intensity ratio ( $F/F_0$ ) in response to tested substances including bovine serum albumin (BSA), human serum albumin (HSA), glucose oxidase (GOX), phenylalanine (Phe), tryptophan (Try), tyrosine (Tyr) and ALP, where  $F$  and  $F_0$  were the fluorescence intensities at 618 nm in presence and absence of tested substances.

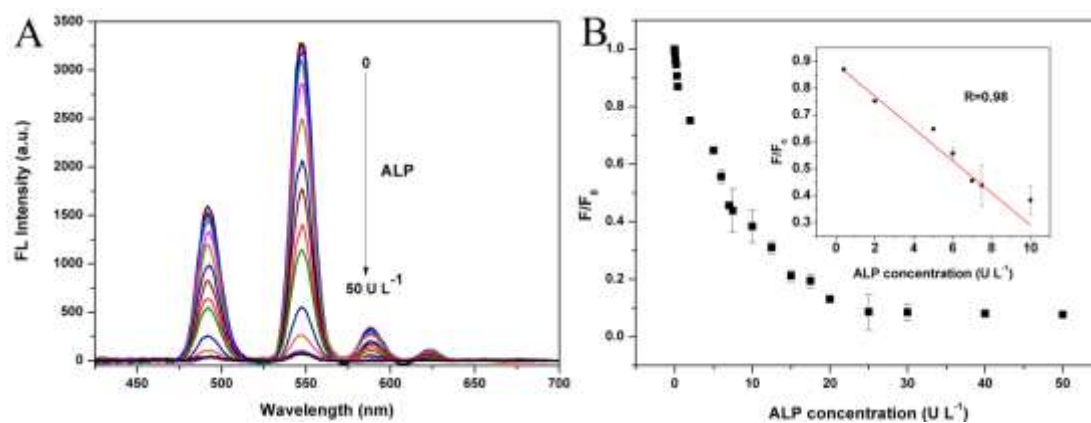

**Fig. S12** (A) Fluorescence emission spectra of Tb-GMP in the presence of different concentrations of ALP from 0 to 50 U L<sup>-1</sup> in Tris-HCl buffer solution (10 mM, pH 7.4) (B) Plot of  $F/F_0$  versus the concentration of ALP from 0.4 to 10 U L<sup>-1</sup> Inset: The linear regression curve with linear relationship from 0.4 to 10 U L<sup>-1</sup>.

**Table S1****Comparison of varied analysis materials for the detection of ALP activity**

| Analysis Material                         | Analytes | Linear range(U L <sup>-1</sup> ) | Detection limit(U L <sup>-1</sup> ) | Real sample  | Reference |
|-------------------------------------------|----------|----------------------------------|-------------------------------------|--------------|-----------|
| coumarin@Tb-GMP                           | ALP      | 25-200                           | 10                                  | No           | 1         |
| NaGdF <sub>4</sub> :Yb/Tm UCNPs           | ALP      | 62.5-875                         | 19                                  | Bovine serum | 2         |
| Au NCs                                    | ALP      | 0.1-10                           | 0.1                                 | No           | 3         |
| CQDs                                      | ALP      | 4.6 - 383.3                      | 1.4                                 | No           | 4         |
| AgNCs                                     | ALP      | 30-240                           | 5                                   | No           | 5         |
| g-C <sub>3</sub> N <sub>4</sub> nanosheet | ALP      | 0.1-1000                         | 0.08                                | No           | 6         |
| GQDs                                      | ALP      | 1-90                             | 0.45                                | Human serum  | 7         |
| Copper Nanoparticles                      | ALP      | 0.06-600                         | 0.035                               | Human serum  | 8         |
| N-CDs                                     | ALP      | 2.5-45                           | 0.4                                 | Human serum  | 9         |
| Copper nanoparticles                      | ALP      | 0.3-7.5                          | 0.3                                 | Human serum  | 10        |
| CdTe quantum dots                         | ALP      | -                                | 10                                  | No           | 11        |
| CDs                                       | ALP      | 16.7-782.6                       | 1.1                                 | No           | 12        |
| Tb-GMP-Eu CPNs                            | ALP      | 0.05-20                          | 0.004                               | Human serum  | This work |

**References**

1. J. Deng, P. Yu, Y. Wang and L. Mao, *Anal. Chem.*, 2015, **87**, 3080-3086.
2. F. Wang, C. Zhang, Q. Xue, H. Li and Y. Xian, *Biosens. Bioelectron.*, 2017, **95**, 21-26.
3. Y. Chen, W. Li, Y. Wang, X. Yang, J. Chen, Y. Jiang, C. Yu and Q. Lin, *J. Mater. Chem. C*, 2014, **2**, 4080-4085.
4. Z. Qian, L. Chai, C. Tang, Y. Huang, J. Chen and H. Feng, *Anal. Chem.*, 2015, **87**, 2966-2973.
5. J. L. Ma, B. C. Yin, X. Wu and B. C. Ye, *Anal. Chem.*, 2016, **88**, 9219-9225.
6. M. H. Xiang, J. W. Liu, N. Li, H. Tang, R. Q. Yu and J. H. Jiang, *Nanoscale*, 2016, **8**, 4727-4732.
7. H. Huang, B. Wang, M. Chen, M. Liu, Y. Leng, X. Liu, Y. Li and Z. Liu, *Sens. Actuators B Chem.*, 2016, **235**, 356-361.
8. J. Li, L. Si, J. Bao, Z. Wang and Z. Dai, *Anal. Chem.*, 2017, **89**, 3681-3686.
9. Y. Hu, X. Geng, L. Zhang, Z. Huang, J. Ge and Z. Li, *Sci. Rep.*, 2017, **7**, 5849.
10. L. Zhang, J. Zhao, M. Duan, H. Zhang, J. Jiang and R. Yu, *Anal. Chem.*, 2013, **85**, 3797-3801.
11. L. Jia, J. P. Xu, D. Li, S. P. Pang, Y. Fang, Z. G. Song and J. Ji, *Chem. Commun.*, 2010, **46**, 7166-7168.
12. Z. S. Qian, L. J. Chai, Y. Y. Huang, C. Tang, J. Jia Shen, J. R. Chen and H. Feng, *Biosens. Bioelectron.*, 2015, **68**, 675-680.
